# Supplementary material for: Physician Confidence in Artificial Intelligence: An Online Mobile Survey
Source: PubMed Central journal article supplement (PMC6452288; doi:10.2196/12422), 2019-03-25
Supplement: jmir_v21i3e12422_app1.pdf [file jmir_v21i3e12422_app1.pdf]

Korean version of Google survey

<https://docs.google.com/forms/d/e/1FAIpQLSdWUjMv9Kfnp38JKFkkN2XOSAHly8ZcqRxCffCvnbuP3UUgXg/viewform>

English version of Google survey

<https://docs.google.com/forms/d/e/1FAIpQLScEVUaMyWz5DWUNvOmTQndNW-MsQi-M1hqRhZQo2WMwizyQA/viewform>

**Supplement Table 1. Questionnaire for attitudes toward medical application of artificial intelligence**

| Question                                                                                                            |                                |                                                     |                                   |                                            |
|---------------------------------------------------------------------------------------------------------------------|--------------------------------|-----------------------------------------------------|-----------------------------------|--------------------------------------------|
| <b>Q1. Do you agree that you have good familiarity with artificial intelligence?</b>                                |                                |                                                     |                                   |                                            |
| <input type="checkbox"/> Strongly agree                                                                             | <input type="checkbox"/> agree | <input type="checkbox"/> Neither agree nor disagree | <input type="checkbox"/> disagree | <input type="checkbox"/> Strongly disagree |
| <b>Q2. Do you agree that artificial intelligence has useful applications in the medical field?</b>                  |                                |                                                     |                                   |                                            |
| <input type="checkbox"/> Strongly agree                                                                             | <input type="checkbox"/> agree | <input type="checkbox"/> Neither agree nor disagree | <input type="checkbox"/> disagree | <input type="checkbox"/> Strongly disagree |
| <b>Q3. Do you agree that the diagnostic ability of AI is superior to the clinical experience of a human doctor?</b> |                                |                                                     |                                   |                                            |
| <input type="checkbox"/> Strongly agree                                                                             | <input type="checkbox"/> agree | <input type="checkbox"/> Neither agree nor disagree | <input type="checkbox"/> disagree | <input type="checkbox"/> Strongly disagree |
| <b>Q4. Do you agree that artificial intelligence could replace your job?</b>                                        |                                |                                                     |                                   |                                            |
| <input type="checkbox"/> Strongly agree                                                                             | <input type="checkbox"/> agree | <input type="checkbox"/> Neither agree nor disagree | <input type="checkbox"/> disagree | <input type="checkbox"/> Strongly disagree |

|                                                                                                                                                                                                                                                                                                                                                                                               |                                |                                                     |                                   |                                            |
|-----------------------------------------------------------------------------------------------------------------------------------------------------------------------------------------------------------------------------------------------------------------------------------------------------------------------------------------------------------------------------------------------|--------------------------------|-----------------------------------------------------|-----------------------------------|--------------------------------------------|
| agree                                                                                                                                                                                                                                                                                                                                                                                         |                                | agree                                               | disagree                          | disagree                                   |
| <b>Q5. Do you agree that you would always use AI when making medical decisions in the future?</b>                                                                                                                                                                                                                                                                                             |                                |                                                     |                                   |                                            |
| <input type="checkbox"/> Strongly agree                                                                                                                                                                                                                                                                                                                                                       | <input type="checkbox"/> agree | <input type="checkbox"/> Neither disagree nor agree | <input type="checkbox"/> disagree | <input type="checkbox"/> Strongly disagree |
| <b>Q6. What are the advantages of using artificial intelligence?</b>                                                                                                                                                                                                                                                                                                                          |                                |                                                     |                                   |                                            |
| <input type="checkbox"/> AI can speed up processes in health care<br><input type="checkbox"/> AI can help reduce medical errors.<br><input type="checkbox"/> AI can deliver vast amounts of clinically relevant high-quality data in real time<br><input type="checkbox"/> AI has no space-time constraint<br><input type="checkbox"/> AI has no emotional exhaustion nor physical limitation |                                |                                                     |                                   |                                            |
| <b>Q7. If your medical judgment and an artificial intelligence's judgments differ, which will you follow?</b>                                                                                                                                                                                                                                                                                 |                                |                                                     |                                   |                                            |
| <input type="checkbox"/> Doctor's opinion<br><input type="checkbox"/> Artificial intelligence's opinion<br><input type="checkbox"/> Patients' choice                                                                                                                                                                                                                                          |                                |                                                     |                                   |                                            |
| <b>Q8. In which field of medicine do you think artificial intelligence will be most useful?</b>                                                                                                                                                                                                                                                                                               |                                |                                                     |                                   |                                            |
| <input type="checkbox"/> Making a diagnosis<br><input type="checkbox"/> Making treatment decisions<br><input type="checkbox"/> Direct treatment (including surgery)<br><input type="checkbox"/> Biopharmaceutical research and development<br><input type="checkbox"/> Providing medical assistance in underserved areas                                                                      |                                |                                                     |                                   |                                            |

Development of social insurance program

**Q9. Which sector of healthcare do you think will be the first to commercialize artificial intelligence?**

Public primary care such as public health centers

Primary care in private clinics

Specialized clinics (spine, knee, obstetrics and gynecology, etc.)

University hospitals

**Q10. What are you concerned about application of AI in medicine?**

It cannot be used to provide opinions in unpredicted situations due to inadequate information

It is not flexible enough to be applied to every patient

It is difficult to apply to controversial subjects

The low ability to sympathize and consider the emotional well-being of the patient

It is developed by a specialist with little clinical experience in medical practice

**Q11. Who do you think will be liable for legal problems caused by artificial intelligence?**

Doctor in charge

Company that created the Artificial Intelligence

Patient who consented to follow Artificial Intelligence's input
